# Supplementary material
Source: PubMed Central journal article supplement (PMC8325380)
Supplement: mmc1.pdf [file mmc1.pdf]

**Table S1:** Representation of “ligand interactions” of 18 conformers of ED-compound interacting in the potential site in ACE2

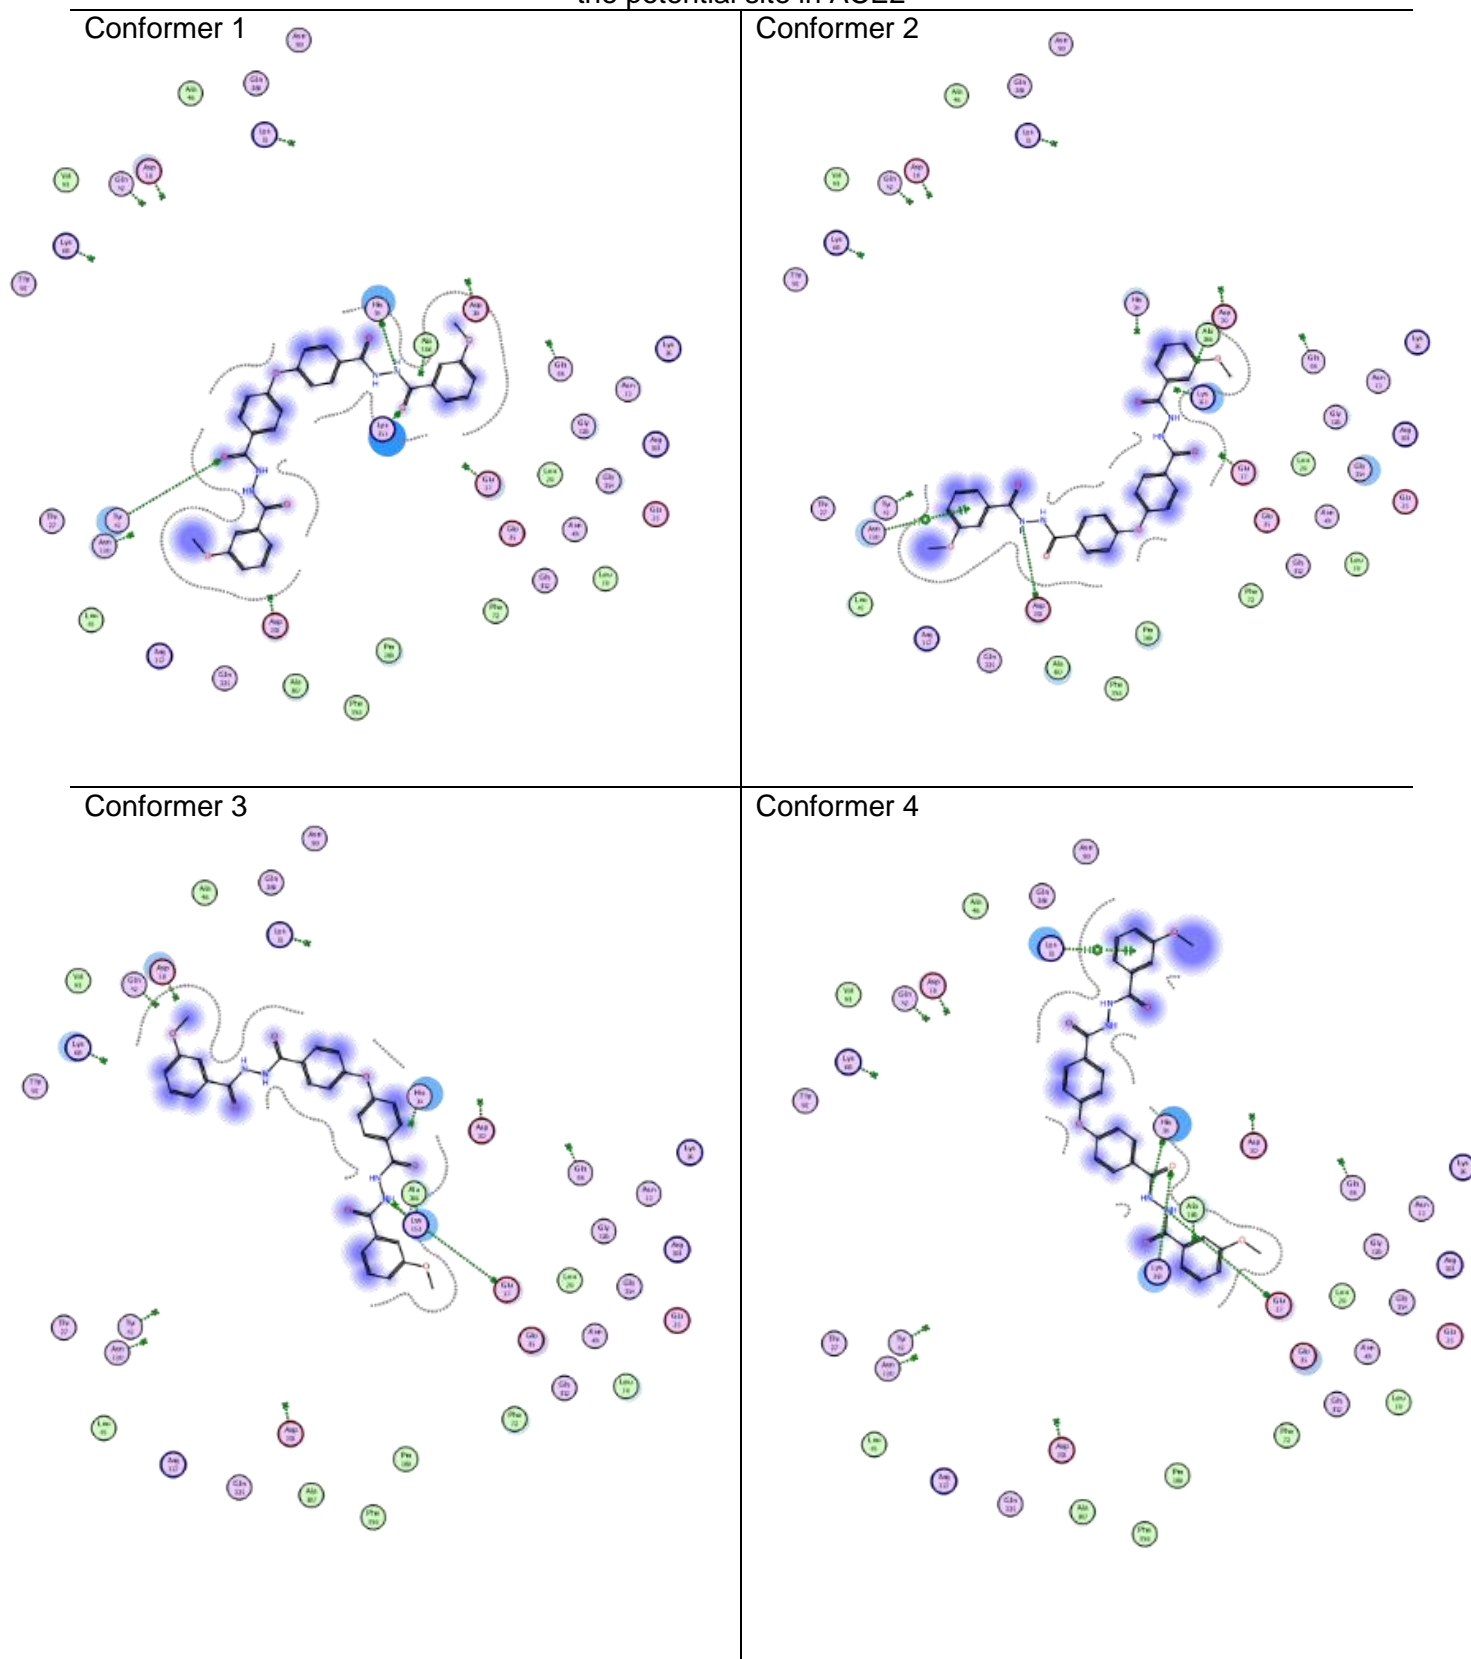

Conformer 5

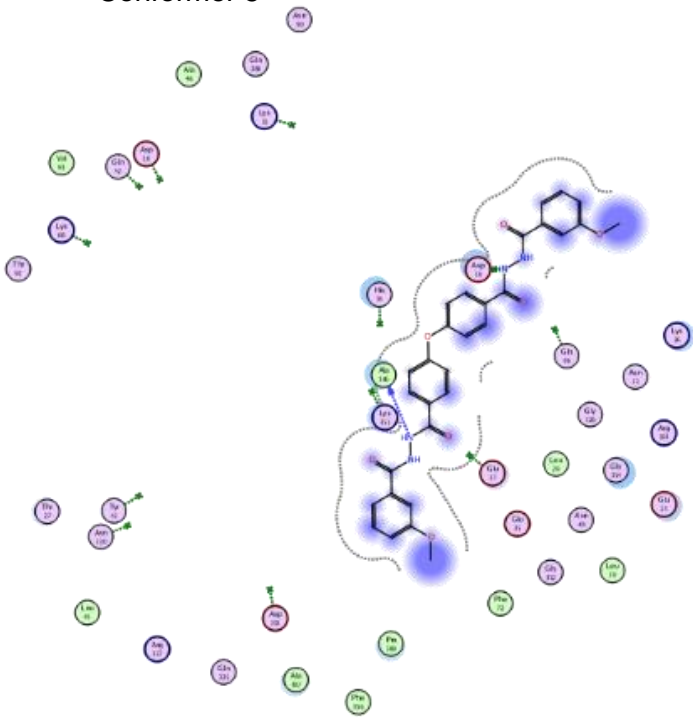

Conformer 6

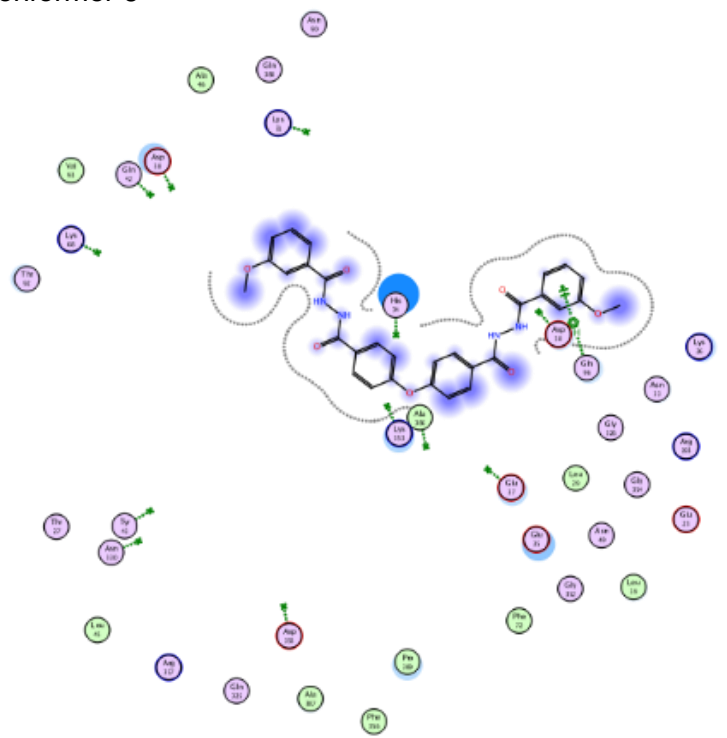

Conformer 7

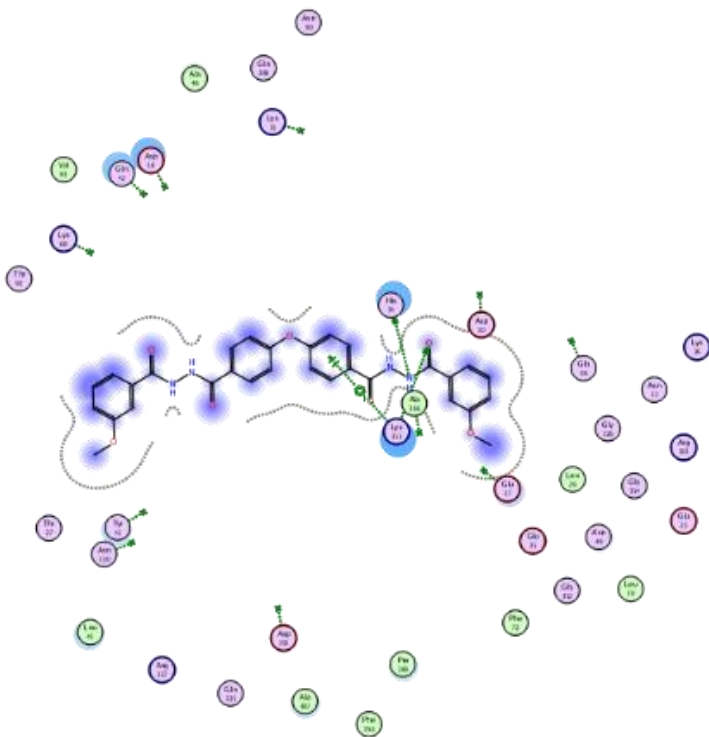

Conformer 8

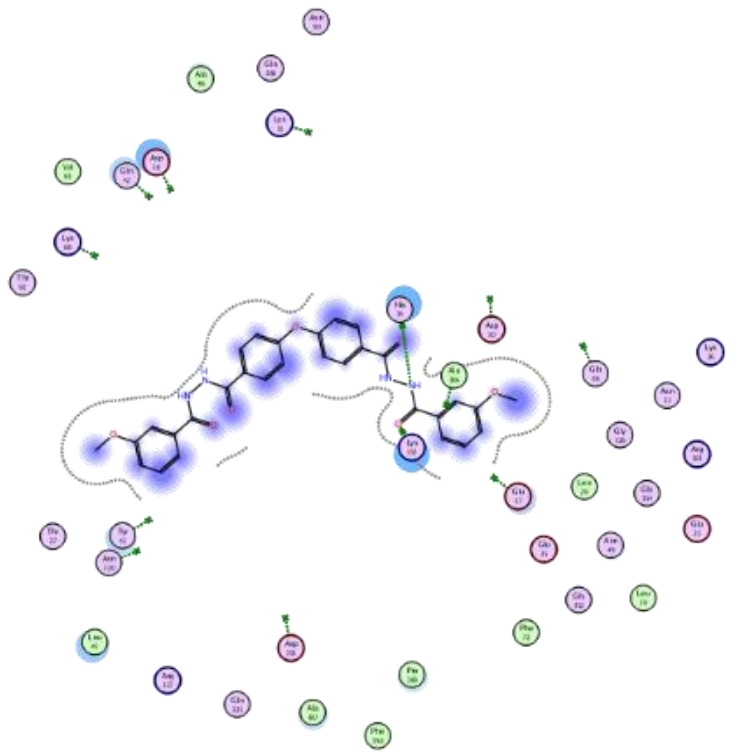



Conformer 13

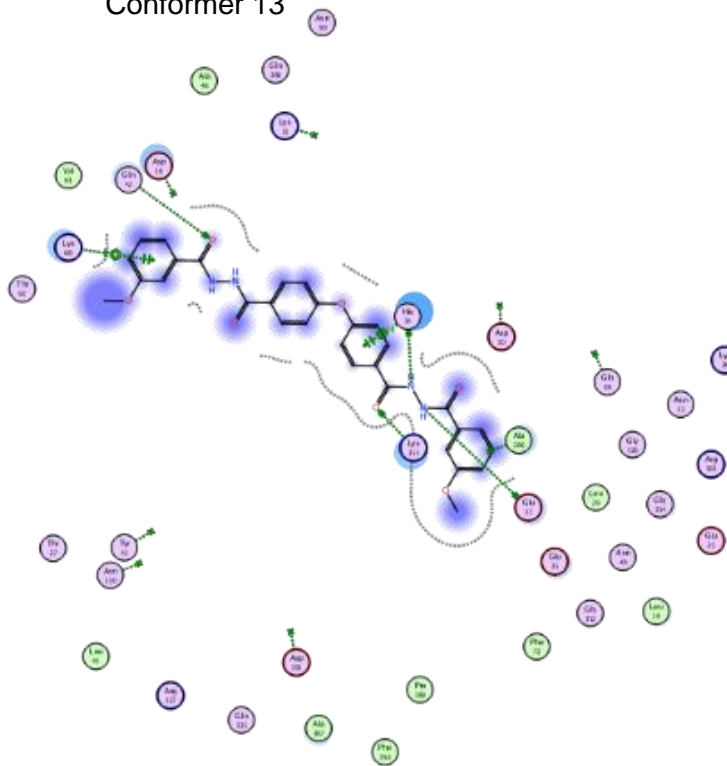

Conformer 14

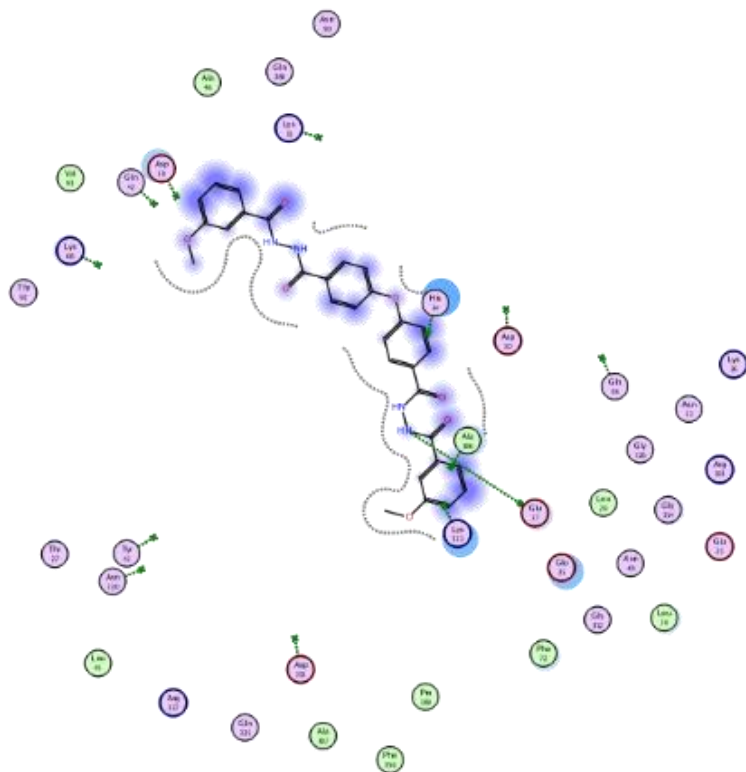

Conformer 15

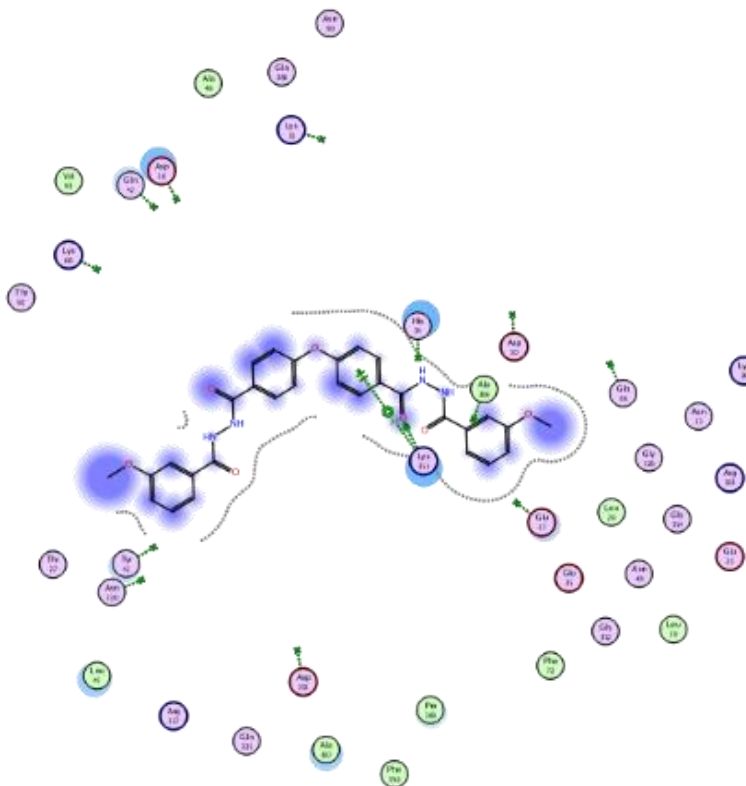

Conformer 16

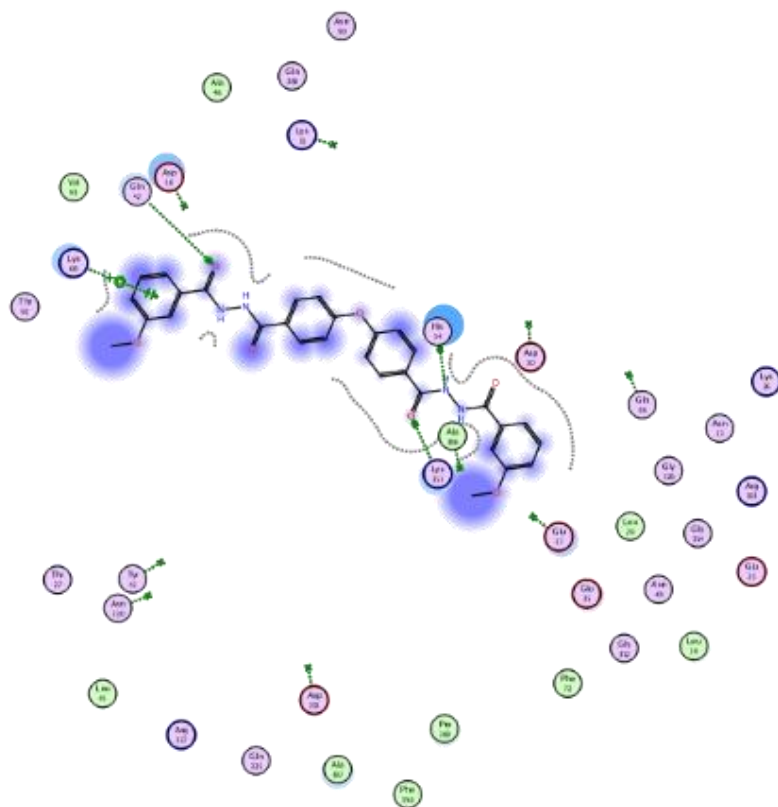

Conformer 17

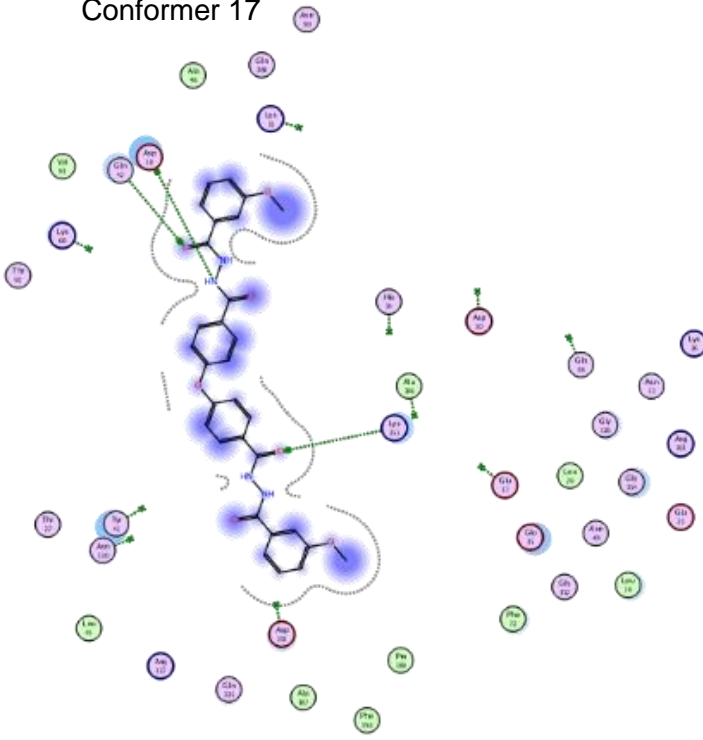

Conformer 18

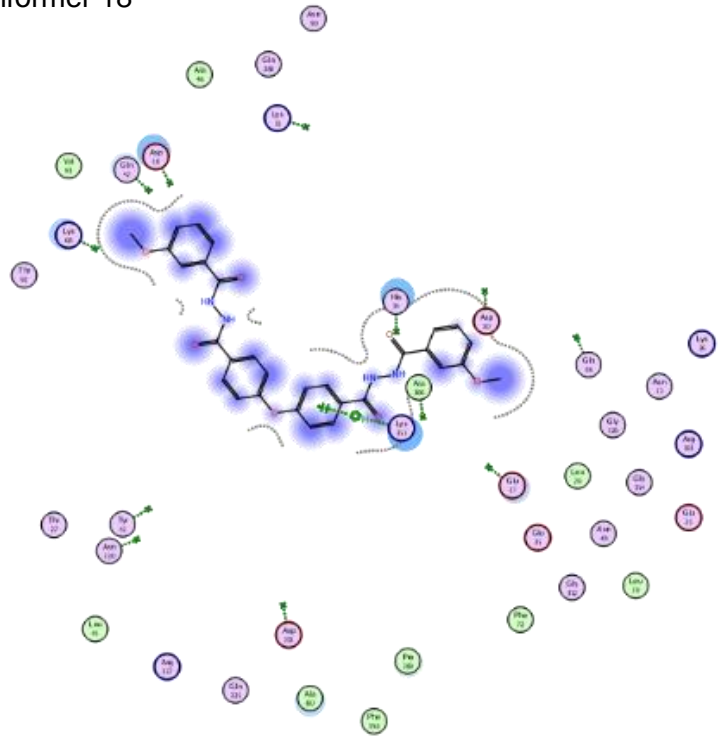

**Table S2. Interaction report of each conformer of ED-compound. Number of conformer, Atom of compound, Amino acid in ACE2, Type of interaction and Energy.**

| Conformer | Ligand | Amino acid in ACE2 |            | Interaction | E (kcal/mol) |
|-----------|--------|--------------------|------------|-------------|--------------|
| <b>1</b>  | N      | His                | 34         | H-donor     | -4.1         |
|           | O      | <b>Lys</b>         | <b>353</b> | H-acceptor  | -6.5         |
|           | O      | Tyr                | 41         | H-acceptor  | -1.2         |
| <b>2</b>  | N      | Asp                | 355        | H-donor     | -3.0         |
|           | 6-ring | Asn                | 330        | pi-H        | -1.8         |
| <b>3</b>  | N      | Glu                | 37         | H-donor     | -0.8         |
| <b>4</b>  | N      | Glu                | 37         | H-donor     | -2.3         |
|           | N      | His                | 34         | H-donor     | -1.0         |
|           | O      | Lys                | 353        | H-acceptor  | -4.5         |
|           | 6-ring | Lys                | 31         | pi-H        | -0.6         |
| <b>5</b>  | N      | Asp                | 30         | H-donor     | -7.4         |
|           | N      | Ala                | 386        | H-donor     | -2.2         |
| <b>6</b>  | 6-ring | Gln                | 96         | pi-H        | -0.6         |
| <b>7</b>  | N      | His                | 34         | H-donor     | -2.4         |
|           | O      | Lys                | 353        | H-acceptor  | -4.9         |
|           | 6-ring | Lys                | 353        | pi-H        | -0.9         |
| <b>8</b>  | N      | His                | 34         | H-donor     | -2.8         |
|           | O      | Lys                | 353        | H-acceptor  | -10.2        |
| <b>9</b>  | N      | His                | 34         | H-donor     | -2.5         |
|           | O      | Lys                | 353        | H-acceptor  | -10.2        |
|           | 6-ring | Lys                | 353        | pi-H        | -1.1         |
| <b>10</b> | N      | His                | 34         | H-donor     | -2.0         |
|           | O      | Lys                | 353        | H-acceptor  | -9.5         |
|           | 6-ring | Lys                | 353        | pi-H        | -0.6         |
| <b>11</b> | N      | His                | 34         | H-donor     | -1.8         |
|           | O      | Lys                | 353        | H-acceptor  | -9.5         |
| <b>12</b> | N      | Glu                | 37         | H-donor     | -0.7         |
|           | N      | Asp                | 30         | H-donor     | -6.3         |
|           | O      | Lys                | 353        | H-acceptor  | -5.9         |
|           | 6-ring | His                | 34         | pi-H        | -0.8         |
| <b>13</b> | N      | Glu                | 37         | H-donor     | -2.8         |
|           | N      | His                | 34         | H-donor     | -2.4         |
|           | O      | Gln                | 42         | H-acceptor  | -1.1         |
|           | O      | Lys                | 353        | H-acceptor  | -8.1         |
|           | 6-ring | His                | 34         | pi-H        | -1.0         |
|           | 6-ring | Lys                | 68         | pi-cation   | -3.7         |
| <b>14</b> | N      | Glu                | 37         | H-donor     | -1.2         |
| <b>15</b> | O      | Lys                | 353        | H-acceptor  | -1.2         |
|           | 6-ring | Lys                | 353        | pi-H        | -0.7         |
| <b>16</b> | N      | His                | 34         | H-donor     | -2.6         |
|           | O      | Gln                | 42         | H-acceptor  | -0.7         |

|           |        |            |            |            |       |
|-----------|--------|------------|------------|------------|-------|
|           | O      | <b>Lys</b> | <b>353</b> | H-acceptor | -12.7 |
|           | 6-ring | Lys        | 68         | pi-cation  | -3.3  |
| <b>17</b> | N      | Asp        | 38         | H-donor    | -0.9  |
|           | O      | Gln        | 42         | H-acceptor | -1.4  |
|           | O      | <b>Lys</b> | <b>353</b> | H-acceptor | -0.7  |
| <b>18</b> | 6-ring | <b>Lys</b> | <b>353</b> | pi-H       | -1.4  |

| <b>Table S3.</b> ED-compound. PubChem CID, ID, Canonical Smile, Interaction with residues in ACE2, Number of conformers used, $\Delta G_{\text{binding}}$ average (kcal/mol-1) with standard deviation (SD), Reported theoretical toxicity/Ames test and LD50 [11]. |                                                                                               |                                                                                            |                      |                                               |                                                                  |                        |
|---------------------------------------------------------------------------------------------------------------------------------------------------------------------------------------------------------------------------------------------------------------------|-----------------------------------------------------------------------------------------------|--------------------------------------------------------------------------------------------|----------------------|-----------------------------------------------|------------------------------------------------------------------|------------------------|
| PubChem CID, ID Chembridge Corp.                                                                                                                                                                                                                                    | Canonical Smile                                                                               | Interaction with residues in ACE2 (Table S1 – S20)                                         | Number of conformers | Average of $\Delta G_{\text{binding}}$ and SD | Toxicity Model Report from ProTox-II server / PreADMET Ames test | Predicted LD50 (mg/kg) |
| 2953854, 7781334                                                                                                                                                                                                                                                    | <chem>COC1=CC=CC(=C1)C(=O)NNC(=O)C2=CC=C(C=C2)OC3=CC=C(C=C3)C(=O)NNC(=O)C4=CC(=CC=C4)O</chem> | Asp30, His34, Glu37, Asp38, Tyr41, Gln42, Lys68, Asn330, <b>Lys353</b> , Asp355 and Ala386 | 18                   | -5.87 ± 0.49                                  | Aryl hydrocarbon Receptor (AhR) 53 % / Non mutagen               | 575                    |
